# Supplementary material for: Infectivity of an Infectious Clone of Banana Streak CA Virus in A-Genome Bananas (Musa acuminata ssp.)
Source: Viruses. 2021 Jun 4;13(6):1071. doi: 10.3390/v13061071 (PMC8226583; doi:10.3390/v13061071)
Supplement: Supplementary file 1 [file viruses-13-01071-s001.zip › Supplementary Table S1.pdf]

**Table S1:** Sequence specific primers used to generate the full-length genome of the BSCAV isolate described in this study

| Primer Name | Sequence 5' – 3'       |
|-------------|------------------------|
| BSV-Cav1    | ATCCTTCTTTGGTTGACTCG   |
| BSV-Cav2    | AGCATTCACCTTTCTCTTCCC  |
| BSV-Cav3    | AACCAAATGGCATAACAAGC   |
| BSV-Cav4    | GAATGAATAGGCAAGATTGG   |
| BSV-Cav5    | ACTATAGTGGAGTTGGTACG   |
| BSV-Cav6    | GATATTACGTCTTACTGGAG   |
| BSV-Cav7    | CGCAGCTGAAGAAGAACAAG   |
| BSV-Cav8    | AGAGCTAAAGGGAAAAGAGC   |
| BSV-Cav9    | CAGTCCAGCAGCATAAAGAG   |
| BSV-Cav10   | GGAAGGAGATAGCACTAAGG   |
| BSV-Cav11   | ATAGAAAATAGTATCCCGGA   |
| BSV-Cav12   | ATGAGTAATACGGTGACCAA   |
| BSV-Cav13   | CTAGAACATCAAGAAATCCA   |
| BSV-Cav14   | GAGAATGAGCTACTTAATGCC  |
| BSV-Cav15   | GTTTTCTGATTCTCTTTCTAGC |
| BSV-Cav16   | GCAGAAGAATTCATCGAGCC   |
| BSV-Cav17   | CTAAGTCCAGTGAATCCAGG   |
| BSV-Cav18   | AAGACAGGAAGAGCATGGGC   |
| BSV-Cav19   | GAACTGGTTATTTCCAGCCC   |
| BSV-Cav20   | CGCAAAGCGGTAGGTCCAGAGG |
| BSV-Cav21   | GTCATCATAATATCTGGGATG  |
| BSV-Cav22   | CAACTGCCTTGTGATCTGGG   |
| BSV-Cav23   | CGTACCTGGTCAGTCACAGAGG |
| BSV-Cav24   | ATCGGGGACTACCTCATCTGGC |
